# Supplementary material for: Ulceroglandular Infection and Bacteremia Caused by Francisella salimarina in Immunocompromised Patient, France
Source: PubMed Central journal article supplement (PMC8798692; doi:10.3201/eid2802.211380), 2022-02
Supplement: 21-1380-Techapp-s1.pdf [file 21-1380-Techapp-s1.pdf]

# Ulceroglandular Infection and Bacteremia Caused by *Francisella salimarina* in Immunocompromised Patient, France

## Appendix

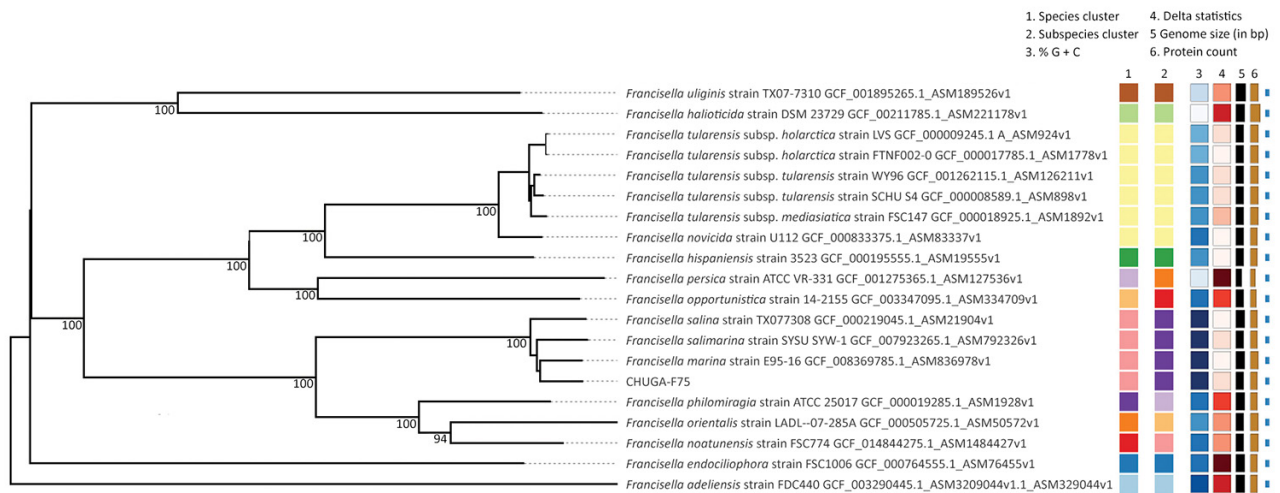

**Appendix Figure.** Genome-scale GBDP (Genome Blast Distance Phylogeny) tree of CHUGA-F75 strain of *Francisella* species, France. Whole genome–based identification of the strain was assessed by using the Type Strain Genome Server (<https://tygs.dsmz.de>).
